---

# Erratum

Wackers FJTh, Young LH, Inzucchi SE, Chyun DA, Davey JA, Barrett EJ, Taillefer R, Wittlin SD, Heller GV, Filipchuk N, Engel S, Ratner RE, Iskandrian AE, the Detection of Ischemia in Asymptomatic Diabetics (DIAD) Investigators: Detection of silent myocardial ischemia in asymptomatic diabetic subjects: the DIAD study. *Diabetes Care* 27:1954–1961, 2004

The authors of the above-listed manuscript wish to acknowledge the following research support from the Division of Research Resources, National Institutes of Health: 5M01 RR00044 (to S.D.W., University of Rochester), 5M01 RR00847 (to E.J.B., University of Virginia), and 5M01 RR0596 (to V. Fonseca, Tulane University).
